# Supplementary material
Source: Research Square preprint supplement (doi:10.21203/rs.3.rs-9781611/v1)
Supplement: Supplementary file 2 [file f87dd2ed830f6197a0ddfbc1.docx]

**Tables:**

PC: Piston Core

cmbsf: centimeters below sea floor

Fax. Soturno: Faxinal do Soturno

*Source: Proenca et al., 2022

**Source: Silva e al., 2025

**Table 2.** Minimum inhibitory concentrations (MIC) of iron (FeSO4.7H2O), selenium (Na2SeO3) and aluminum (NH4Al(SO4)2.12 H2O) for the 12 bacterial isolates from the Guarani Aquifer System and for the reference strains (ATCC 27853 and ATCC 33019). Isolates with distinguished results are highlighted: the isolate that presented the highest MIC values of all metals is in dark grey, and those with the highest iron and aluminum MICs and the second highest selenium MIC are in light gray.

| **Isolates** | **Taxonomic identification** | **Minimum inhibitory concentrations (mM)** | | |
| --- | --- | --- | --- | --- |
| **iron** | **aluminum** | **selenium** |
| **CAP2** | *Pseudomonas* sp. | 16 | 8 | 16 |
| **CAP10** | Unidentified | 16 | 8 | 4 |
| **CAP3** | Unidentified | 16 | 8 | 128 |
| **CAE1** | *Staphylococcus sp.* | 8 | 8 | 32 |
| **CAV19** | *Bacillus sp.* | 16 | 8 | 64 |
| **CAV23** | *Bacillus sp.* | 8 | 8 | 64 |
| **GRU33** | *Lysinibacillus sp.* | 8 | 4 | 256 |
| **VB5** | *Bacillus sp.* | 16 | 8 | 256 |
| **RF3121** | *Lysinibacillus sp.* | 16 | 4 | 8 |
| **RF311** | Unsup*. Lysinibacillus* | 8 | 8 | 64 |
| **MEL13** | Unsup. *Lysinibacillus* | 8 | 4 | 128 |
| **NSP5** | Unidentified | 16 | 8 | 128 |
| **ATCC 27853** | *P. aeruginosa* | 16 | 4 | 64 |
| **ATCC 33019** | *B. cereus* | 16 | 8 | 64 |

**Table 3.** Minimum inhibitory concentrations (MIC) of mercury ((CH3COO)2Hg), copper (CuCl2.2H2O) and nickel (NiCl2.6H2O) for the 12 bacterial isolates from the Rio Grande Cone, and for the reference strains (ATCC 27853 and ATCC 33019). Isolates with distinguished results are highlighted: the isolate that presented the highest MIC values of mercury and nickel, and the second highest of copper is in dark grey, whereas those that exhibited the highest MIC of at least one metal are in light gray.

| **Isolates** | **Taxonomic identification** | **Minimum inhibitory concentrations (mM)** | | |
| --- | --- | --- | --- | --- |
| **mercury** | **copper** | **nickel** |
| **MD330.6** | *Pseudomonas* sp. | 0.06 | 8 | 8 |
| **MD330.9** | *Pseudomonas* sp. | 0.06 | 8 | 4 |
| **MD330.10** | *Pseudomonas* sp. | 0.06 | 8 | 8 |
| **MD330.11** | *Pseudomonas* sp. | 0.125 | 8 | 8 |
| **MD332.6** | *Pseudomonas* sp. | 0.06 | 8 | 8 |
| **MD332.8** | *Pseudomonas* sp. | 0.125 | 8 | 16 |
| **MET17** | *Paenibacillus* sp. | 0.06 | 16 | 8 |
| **MET16** | *Paenibacillus* sp. | 0.125 | 8 | 8 |
| **MR16** | *B. laterosporus* | 0.125 | 8 | 4 |
| **MR06** | *B. megaterium* | 0.125 | 2 | 16 |
| **MR29** | *Bacillus* sp. | 0.125 | 4 | 4 |
| **MR38** | *Bacillus* sp. | 0.125 | 4 | 4 |
| **ATCC 27853** | *P. aeruginosa* | 0.125 | 8 | 8 |
| **ATCC 33019** | *B. cereus* | 0.125 | 8 | 8 |

**Table 4.** Compilation of results of isolates from the Guarani Aquifer System and Rio Grande Cone that presented unique properties across our analyses. The isolates that had the highest MICs for each tested metal are indicated as “++”, while those with other high MICs values are marked as “+”. The ability of biofilm formation is noted as *** (strong producer), ** (moderate producer), or * (weak producer). PCR results for genes involved in selenium and mercury resistance, and observations from SEM images are also informed. The four isolates with relevant combinations of properties are indicated in bold letters.

| **Env.** | **Isolate** | **Maximum MIC (mM)** | | | | | | **Biofilm** | | **Genes** | **SEM** |
| --- | --- | --- | --- | --- | --- | --- | --- | --- | --- | --- | --- |
| Fe | Al | Se | Hg | Cu | Ni | 24h | 48h |
| **Guarani Aquifer System** | *Pseudomonas* sp. CAP2 | ++ | ++ | + |  |  |  | *** | *** | NT | NT |
| *Bacillus* sp. CAV19 | ++ | ++ | + |  |  |  | ** | * | NT | NT |
| ***Bacillus* sp. VB5** | ++ | ++ | ++ |  |  |  | * |  | ND | Se nanoparticles |
| ***Lysinibacillus* sp. GRU33** | + | + | ++ |  |  |  | *** |  | ND | Se nanoparticles |
| *Unsup. Lysinibacillus* MEL13 | + | + | + |  |  |  | ** | ** | ND | NT |
| **Unidentified CAP3** | ++ | ++ | + |  |  |  | *** |  | *selD* | NT |
| **Rio Grande Cone** | *Pseudomonas* sp. MD332.8 |  |  |  | ++ | + | ++ | ** |  | *merA* | NT |
| ***Pseudomonas* sp. MD330.11** |  |  |  | ++ | + | + | ** | * | *merA* | EPS, Hg particles |
| *Bacillus* sp. MR06 |  |  |  | ++ | + | ++ | * |  | *merA* | NT |
| *Paenibacillus* sp. MET16 |  |  |  | ++ | + | + | * | * | NT | EPS, Hg particles |

NT = not tested; ND = not detected.
